# Supplementary material for: Chemical Composition and Cytotoxic Activity of the Essential Oil and Oleoresins of In Vitro Micropropagated Ansellia africana Lindl: A Vulnerable Medicinal Orchid of Africa
Source: MDPI journal article supplement (doi:10.3390/molecules26154556), 2021-07-28
Supplement: s1 [file s1]

Article

# Chemical Composition and Cytotoxic Activity of the Essential Oil and Oleoresins of In Vitro Micropropagated *Ansellia africana* Lindl: A Vulnerable Medicinal Orchid of Africa

Md. Moshfekus Saleh-E-In <sup>†</sup>, Paromik Bhattacharyya and Johannes Van Staden <sup>\*</sup>

Research Centre for Plant Growth and Development, School of Life Sciences, University of KwaZulu-Natal Pietermaritzburg, Private Bag X01, Scottsville 3209, South Africa; saleheimn@kangwon.ac.kr (M.M.S.); paromik600@gmail.com (P.B.)

<sup>\*</sup> Correspondence: rcpgd@ukzn.ac.za; Tel: +27 33 2605130

<sup>†</sup> Current address: Department of Forest Resources, Kangwon National University, Chuncheon 200-701, South Korea.

## List of figure

**Citation:** Saleh-E-In, M.M.; Bhattacharyya, P.; Van Staden, J. Chemical composition and cytotoxic activity of the essential oil and oleoresins of in vitro micropropagated *Ansellia africana* Lindl: A vulnerable medicinal orchid of Africa. *Molecules* **2021**, *26*, 4556. <https://doi.org/10.3390/molecules26154556>

Academic Editor: Ricardo Calhelha

Received: 14 June 2021

Accepted: 20 July 2021

Published: 28 July 2021

**Publisher's Note:** MDPI stays neutral with regard to jurisdictional claims in published maps and institutional affiliations.

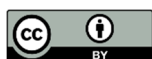

**Copyright:** © 2021 by the authors. Licensee MDPI, Basel, Switzerland. This article is an open access article distributed under the terms and conditions of the Creative Commons Attribution (CC BY) license (<http://creativecommons.org/licenses/by/4.0/>).

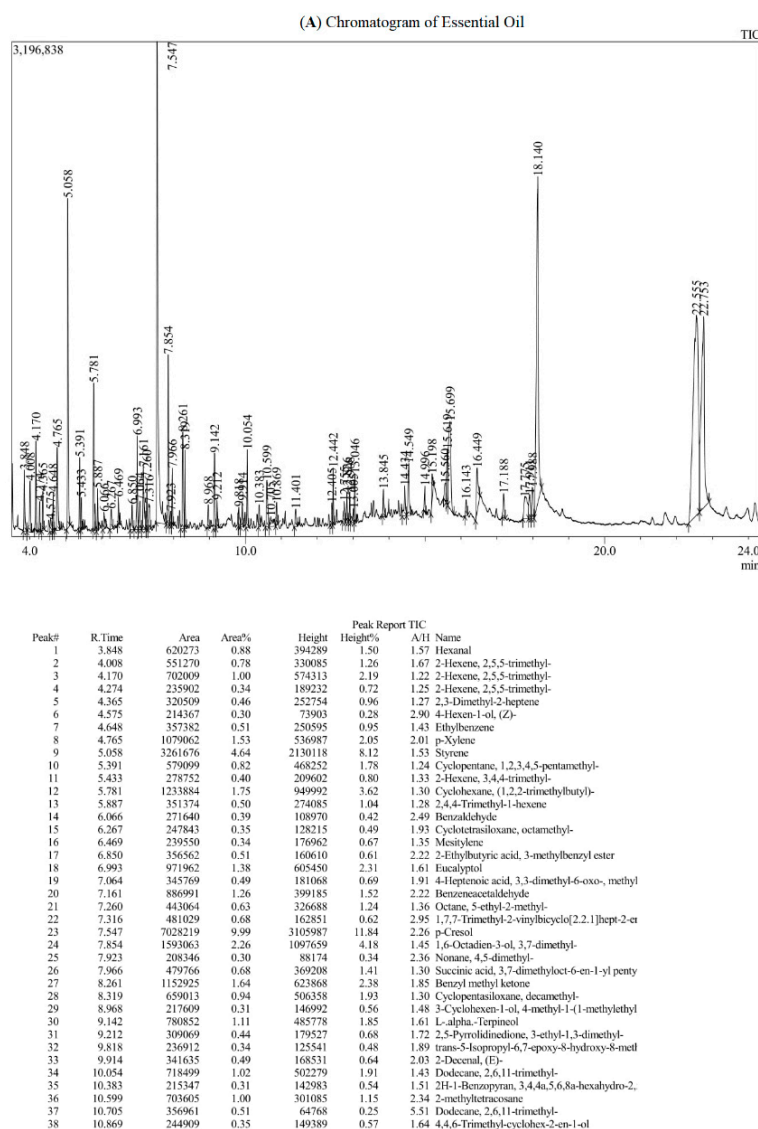

| Peak# | R.Time | Area     | Area%  | Height   | Height% | A/H Name                                            |
|-------|--------|----------|--------|----------|---------|-----------------------------------------------------|
| 39    | 11.401 | 251596   | 0.36   | 114873   | 0.44    | 2.19 Ethanone, 1-(1,3a,4,5,6,7-hexahydro-4-hydrox   |
| 40    | 12.405 | 263731   | 0.37   | 142539   | 0.54    | 1.85 Cyclopropanecarboxylic acid, 1-(phenylmethy    |
| 41    | 12.442 | 527716   | 0.75   | 367948   | 1.40    | 1.43 Eicosane                                       |
| 42    | 12.755 | 283426   | 0.40   | 131500   | 0.50    | 2.16 Cyclohexanecarboxylic acid, 4-nitrophenyl est  |
| 43    | 12.826 | 323420   | 0.46   | 191941   | 0.73    | 1.68 1,8(2H,5H)-Naphthalenedione, hexahydro-8a-     |
| 44    | 12.908 | 286292   | 0.41   | 197017   | 0.75    | 1.45 Eicosane                                       |
| 45    | 13.005 | 268235   | 0.38   | 91075    | 0.35    | 2.95 1-Oxaspiro[4.5]dec-6-ene, 2,6,10,10-tetrametl  |
| 46    | 13.046 | 507735   | 0.72   | 318105   | 1.21    | 1.60 2(4H)-Benzofuranone, 5,6,7,7a-tetrahydro-4,4   |
| 47    | 13.845 | 366345   | 0.52   | 176522   | 0.67    | 2.08 3-Isopropyl-6,7-dimethyltricyclo[4.4.0.0(2,8)] |
| 48    | 14.434 | 463947   | 0.66   | 193531   | 0.74    | 2.40 Naphthalene, 1,6-dimethyl-4-(1-methylethyl)-   |
| 49    | 14.549 | 841818   | 1.20   | 335849   | 1.28    | 2.51 Eicosane                                       |
| 50    | 14.996 | 262263   | 0.37   | 167494   | 0.64    | 1.57 Eicosane                                       |
| 51    | 15.198 | 321007   | 0.46   | 169100   | 0.64    | 1.90 Tetradecanoic acid                             |
| 52    | 15.560 | 344290   | 0.49   | 110495   | 0.42    | 3.12 Spiro[2.4]heptane-5-methanol, 5-hydroxy-       |
| 53    | 15.619 | 820210   | 1.17   | 355411   | 1.35    | 2.31 Heptadecane                                    |
| 54    | 15.699 | 2652147  | 3.77   | 565515   | 2.15    | 4.69 2-Pentadecyn-1-ol                              |
| 55    | 16.143 | 214199   | 0.30   | 104537   | 0.40    | 2.05 2-Pentadecanone, 6,10,14-trimethyl-            |
| 56    | 16.449 | 924926   | 1.31   | 285815   | 1.09    | 3.24 Pentadecanoic acid                             |
| 57    | 17.188 | 368633   | 0.52   | 155608   | 0.59    | 2.37 Eicosane                                       |
| 58    | 17.775 | 995551   | 1.42   | 137870   | 0.53    | 7.22 Palmitoleic acid                               |
| 59    | 17.911 | 451474   | 0.64   | 154904   | 0.59    | 2.91 Eicosane                                       |
| 60    | 17.988 | 555015   | 0.79   | 199885   | 0.76    | 2.78 Dibutyl phthalate                              |
| 61    | 18.140 | 8093213  | 11.50  | 2105824  | 8.02    | 3.84 1(+)-Ascorbic acid 2,6-dihexadecanoate         |
| 62    | 22.555 | 12961627 | 18.42  | 1290816  | 4.92    | 10.04 9,12-Octadecadienoic acid (Z,Z)-              |
| 63    | 22.753 | 7727853  | 10.98  | 1235928  | 4.71    | 6.25 9,12,15-Octadecatrienoic acid, (Z,Z,Z)-        |
|       |        | 70353368 | 100.00 | 26242435 | 100.00  |                                                     |

(B) Chromatogram of acetone extract

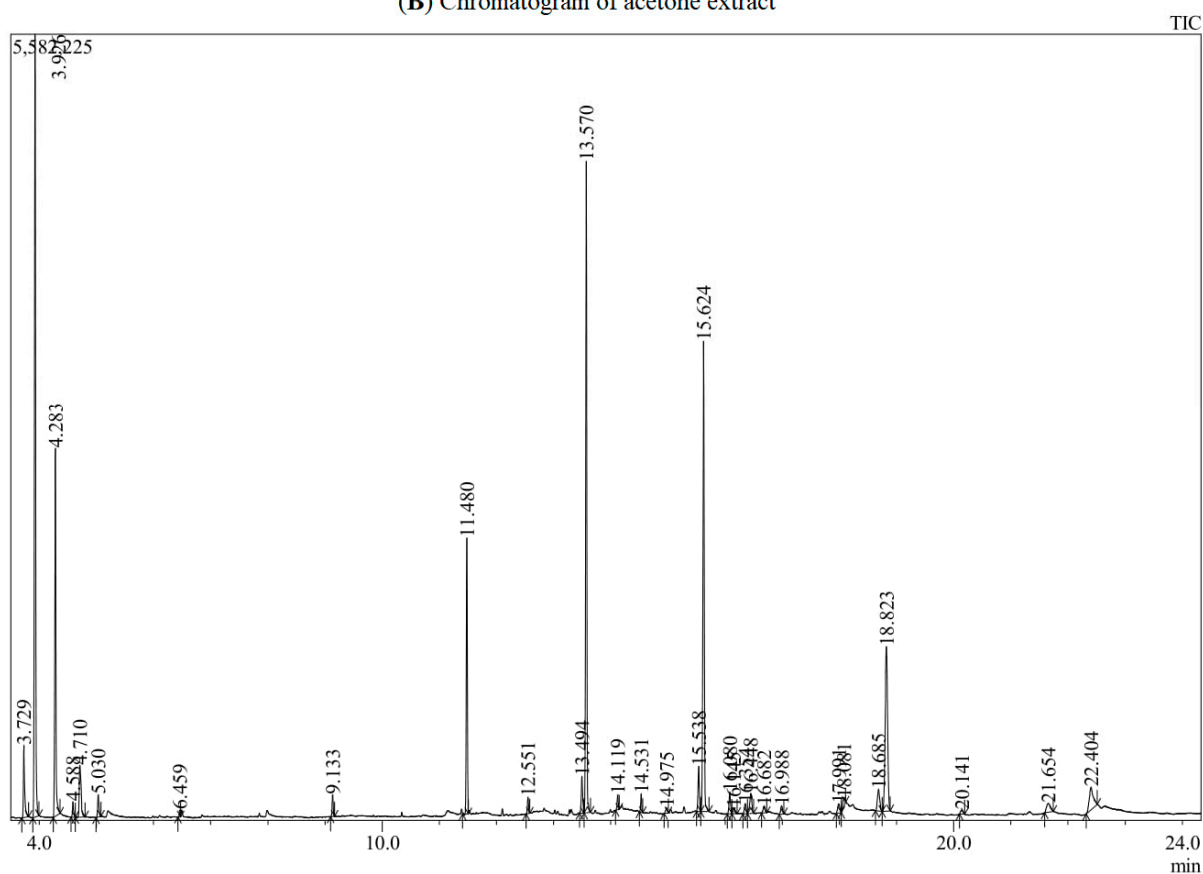



| Peak Report TIC |        |          |        |          |         |                                               |
|-----------------|--------|----------|--------|----------|---------|-----------------------------------------------|
| Peak#           | R.Time | Area     | Area%  | Height   | Height% | A/H Name                                      |
| 1               | 3.804  | 2108935  | 2.54   | 2027380  | 3.74    | 1.04 Toluene                                  |
| 2               | 4.207  | 11910981 | 14.34  | 9055995  | 16.71   | 1.32 Acetic acid, butyl ester                 |
| 3               | 4.507  | 3976511  | 4.79   | 3126780  | 5.77    | 1.27 2-Pentanone, 4-hydroxy-4-methyl-         |
| 4               | 4.791  | 1109387  | 1.34   | 915732   | 1.69    | 1.21 Ethylbenzene                             |
| 5               | 4.897  | 4355171  | 5.24   | 2578857  | 4.76    | 1.69 p-Xylene                                 |
| 6               | 5.171  | 18440978 | 22.20  | 12881855 | 23.76   | 1.43 Styrene                                  |
| 7               | 6.162  | 802559   | 0.97   | 289481   | 0.53    | 2.77 Mesitylene                               |
| 8               | 6.289  | 754527   | 0.91   | 616150   | 1.14    | 1.22 Cyclotetrasiloxane, octamethyl-          |
| 9               | 6.500  | 1670407  | 2.01   | 1247082  | 2.30    | 1.34 Mesitylene                               |
| 10              | 6.532  | 579136   | 0.70   | 489470   | 0.90    | 1.18 Decane                                   |
| 11              | 6.873  | 643861   | 0.78   | 464129   | 0.86    | 1.39 Benzene, 1-ethyl-2-methyl-               |
| 12              | 7.195  | 541152   | 0.65   | 238848   | 0.44    | 2.27 1-Triazene, 1-methyl-3-(4-methylphenyl)- |
| 13              | 7.240  | 512000   | 0.62   | 361072   | 0.67    | 1.42 Benzene, 1-methyl-3-propyl-              |
| 14              | 7.319  | 886162   | 1.07   | 556302   | 1.03    | 1.59 Benzene, 1,4-diethyl-                    |
| 15              | 7.569  | 2138508  | 2.57   | 725809   | 1.34    | 2.95 dl-Erythro-1-phenyl-1,2-propanediol      |
| 16              | 7.615  | 770846   | 0.93   | 439982   | 0.81    | 1.75 Benzene, 1-ethyl-2,4-dimethyl-           |
| 17              | 7.692  | 958088   | 1.15   | 633098   | 1.17    | 1.51 Benzene, 1-ethyl-3,5-dimethyl-           |
| 18              | 7.846  | 522461   | 0.63   | 406156   | 0.75    | 1.29 1-Undecene, 4-methyl-                    |
| 19              | 8.116  | 626331   | 0.75   | 486050   | 0.90    | 1.29 Benzene, 1,2,4,5-tetramethyl-            |
| 20              | 8.164  | 902805   | 1.09   | 681618   | 1.26    | 1.32 Benzene, 1,2,4,5-tetramethyl-            |
| 21              | 8.310  | 2464696  | 2.97   | 1839911  | 3.39    | 1.34 Cyclopentasiloxane, decamethyl-          |
| 22              | 9.125  | 501944   | 0.60   | 271414   | 0.50    | 1.85 Dodecane                                 |
| 23              | 11.473 | 3180179  | 3.83   | 1870827  | 3.45    | 1.70 Tetradecane                              |
| 24              | 13.566 | 7810397  | 9.40   | 4997475  | 9.22    | 1.56 Heptadecane                              |
| 25              | 15.536 | 682552   | 0.82   | 408700   | 0.75    | 1.67 n-Nonadecanol-1                          |
| 26              | 15.623 | 7850027  | 9.45   | 4369683  | 8.06    | 1.80 Hencicosane                              |
| 27              | 18.090 | 1062750  | 1.28   | 425977   | 0.79    | 2.49 l-(+)-Ascorbic acid 2,6-dihexadecanoate  |
| 28              | 18.820 | 5315373  | 6.40   | 1803382  | 3.33    | 2.95 Eicosane                                 |
|                 |        | 83078724 | 100.00 | 54209215 | 100.00  |                                               |

Figure S1. GC-MS Chromatogram of (A) essential oil, (B) acetone extract and (C) ethyl acetate extract.
